# Supplementary material
Source: publisher figshare collection journal article supplement (https://sage.figshare.com/ndownloader/files/20718201)
Supplement: Supplementary file 1 [file 20718201]

**Focus Group Guide**

“As you know, there is a lot of talk these days about immigration and deportation of immigrants in the United States. We want to know how the current news and activities are affecting your daily lives.”

**--- SOURCES OF INFORMATION ---**

1. **Let’s begin by sharing what you are hearing about changes in immigration laws and activities these days. What do you know about these changes?**

Where have you been hearing about the immigration activities?

If RADIO not mentioned, No one has mentioned the radio – have you heard any news on the radio?

If Social Media not mentioned, “No one has mentioned things like twitter or Facebook or snapchat. Have you, you family or others you know heard anything through those things?”

If TV not mentioned, “No one has mentioned the TV. Has anyone seen anything on TV about this?” Ask about specific TV stations and programs.

If School not mentioned, “No one mentioned school. Has anyone at your child’s school discussed this with you?”

If Church not mentioned, “How about at church – do people there talk about these issues?”

If neighbors and workplace not mentioned, “How about your neighbors or work places. Is there any talk about these issues?”

If Newspaper not mentioned, “No one has mentioned the newspaper. Has anyone read anything in any newspaper on this?” Probe by asking about specific newspapers.

(2) “**Does anyone know about specific activities of immigration authorities over the past few months here in this community?**”

- Have you known of anyone stopped by immigration authorities? What were the circumstances around that?
- Who is being targeted by the deportation laws?
- How are immigration officials identifying people to deport?

Probe: Tell us more about what happened. Where did you hear about it?

If travel not mentioned, ask: “How about travel? Has anyone changed plans for travel outside of the United States?”

(3) **Next, I’d like to talk about how these changes around immigration have affected you, your family, and people you know. What changes have you noticed?**

- PROBE: FEELINGS ON BEING AFRAID, WORRIED, FEARFUL
- PROBE: CHANGES IN DAILY LIFE ROUTINES

Are there changes in how you are treated when you go out in public such as to the grocery store and other places?

If work not mentioned, How about at a place where you work or in looking for a new work?

If kids not mentioned, “What about your kids? Do they talk about specific things that have happened? Do they worry about certain things? Do you as a parent have specific worries about the children?

- PROBE ON SPECIFIC WORRIES OR FEARS RELATED TO KIDS, “When you say your child is afraid – what are they saying and doing?”

**--- THOUGHTS ON THE FUTURE ---**

Thank you all very much for this information – it is very helpful. Before we end, I’d like to spend a little bit of time hearing about how you think the actions around immigration will affect your future and the lives of children in immigrant families.

PROBE: No one has mentioned moving back to the country they came from. Is this something you or others you know are considering? Can you talk more about the reasons why or why not?

**-- CLOSING --**

Is there anything else that you think we should know in order to better understand this situation?

Thank you very much for your time providing this important information to us today.

We will now provide you a $50 gift card for your time today.
